# Supplementary material for: Radiogenomics Reveals Correlation between Quantitative Texture Radiomic Features of Biparametric MRI and Hypoxia-Related Gene Expression in Men with Localised Prostate Cancer
Source: MDPI journal article supplement (doi:10.3390/jcm12072605), 2023-03-30
Supplement: s1 [file s1]

## Supplementary Tables

- **Supplementary Table S1.** Summary for radiomic features.

|    | Variable               | Mean | Median | SD     | Min | Max |
|----|------------------------|------|--------|--------|-----|-----|
| 1  | AngularSecMomT2WI      | 0.4  | 0.3    | 0.14   | 0.2 | 0.6 |
| 2  | ContrastT2WI           | 69.1 | 53     | 52.644 | 20  | 188 |
| 3  | CorrelationT2WI        | 0.6  | 0.6    | 0.118  | 0.3 | 0.8 |
| 4  | SumSquareVarianceT2WI  | 96.3 | 95     | 23.427 | 50  | 146 |
| 5  | InverseDifferenceT2WI  | 0.3  | 0.2    | 0.206  | 0.1 | 0.8 |
| 6  | SumAverageT2WI         | 59.6 | 64     | 9.156  | 30  | 65  |
| 7  | SumVarianceT2WI        | 41.4 | 36     | 13.767 | 20  | 68  |
| 8  | SumEntropyT2WI         | 3.9  | 3.6    | 0.689  | 3.1 | 5.1 |
| 9  | EntropyT2WI            | 2.8  | 2.6    | 1.256  | 1.1 | 5   |
| 10 | DifferenceVarianceT2WI | 40.6 | 41     | 7.189  | 20  | 52  |
| 11 | DifferenceEntropyT2WI  | 3.2  | 3.1    | 1.441  | 1.2 | 6.3 |
| 12 | AngSecMomADC           | 0.5  | 0.4    | 0.449  | 0.3 | 2.1 |
| 13 | ContrastADC            | 44.5 | 48     | 13.999 | 18  | 66  |
| 14 | CorrelationADC         | 0.5  | 0.5    | 0.264  | 0.1 | 0.9 |
| 15 | SumSquareVarianceADC   | 70.3 | 52     | 23.578 | 50  | 102 |
| 16 | inverseDifferenceADC   | 0.5  | 0.5    | 0.206  | 0.1 | 0.9 |
| 17 | SumAverageADC          | 44.5 | 36     | 27.689 | 9   | 93  |
| 18 | SumVarianceADC         | 36.7 | 36     | 5.64   | 27  | 47  |
| 19 | SumEntropyADC          | 3.2  | 2.8    | 0.916  | 1.8 | 4.5 |
| 20 | EntropyADC             | 1.4  | 1.3    | 0.342  | 1   | 2.1 |
| 21 | DifferenceVarianceADC  | 27.5 | 27     | 9.149  | 11  | 43  |
| 22 | DifferentEntropyADC    | 1.5  | 1.2    | 0.897  | 1   | 4.6 |
| 23 | MeanT2WI               | 33.4 | 34     | 8.399  | 16  | 43  |
| 24 | MeanADC                | 42.7 | 47     | 11.412 | 19  | 58  |
| 25 | SkewnessT2WI           | 0.4  | 0.4    | 0.389  | 0.1 | 1.4 |
| 26 | SkewnessADC            | 0.6  | 0.5    | 0.511  | 0.1 | 1.8 |
| 27 | KurtosisT2WI           | 1.1  | 0.4    | 1.379  | 0.1 | 3.7 |
| 28 | KurtosisADC            | 0.8  | 0.6    | 0.829  | 0.1 | 2.7 |

**Supplementary Table S2:** Description of Histogram and Grey-level co-occurrence Matrix (GLCM) features computed within the region of interest (ROI) of prostate tumour.

| Texture Features                              | Description                                                                                                                              |
|-----------------------------------------------|------------------------------------------------------------------------------------------------------------------------------------------|
| <b>Histogram (first order features)</b>       | <b>They are derived from first order statistics and provides information related to grey level distribution of ROI.</b>                  |
| Mean                                          | Average grey level intensity                                                                                                             |
| Skewness                                      | Measures the spread distribution of values about the average value.                                                                      |
| Kurtosis                                      | Measures the peakedness of distribution of values in image.                                                                              |
| <b>Grey-level co-occurrence matrix (GLCM)</b> | <b>(2nd order statistic<br/>Characterizing spatial relationship between intensity values within ROIs).</b>                               |
| Angular Second moment                         | Measures the textural uniformity that is pixel pair recurrences. It detects disorder in textures                                         |
| Contrast                                      | Measures local intensity variations                                                                                                      |
| Correlation                                   | Explains the linear dependency of Grey level values to their respective voxels in the GLCM                                               |
| Sum Square Variance                           | Measures the distribution of neighbouring intensity level pairs about the average of intensity level in the GLCM                         |
| Inverse Difference                            | Measures of the local homogeneity of an image                                                                                            |
| Sum Average                                   | Measures the relationship between occurrences of pairs with lower intensity values and occurrences of pairs with higher intensity values |
| Sum Variance                                  | Explains the weights elements that differ from the average value of the GLCM.                                                            |
| Entropy                                       | Explains the randomness in the GLCM                                                                                                      |
| Sum Entropy                                   | Explains the sum of neighbourhood intensity value differences.                                                                           |
| Difference Variance                           | Measure of heterogeneity that places higher weights on differing intensity level pairs that deviate more from the mean.                  |
| Difference Entropy                            | Measure of the randomness/variability in neighbourhood intensity value differences.                                                      |

**Supplementary Table S3:** Gleason grading system.

| <b>Gleason (n)</b>                     | <b>Gleason score</b>         | <b>Risk Group</b>         |
|----------------------------------------|------------------------------|---------------------------|
| Grade Group 1 (5)                      | $\leq 6$                     | Low                       |
| Grade Group 2 (5)<br>Grade Group 3 (0) | 3+4=7<br>4+3=7               | Medium or<br>Intermediate |
| Grade Group 4 (3)<br>Grade Group 5 (2) | 4+4=8; 3+5=8 ; 5+3=8 or<br>9 | High                      |
