# Supplementary material for: Radiogenomics Reveals Correlation between Quantitative Texture Radiomic Features of Biparametric MRI and Hypoxia-Related Gene Expression in Men with Localised Prostate Cancer
Source: J Clin Med. 2023 Mar 30;12(7):2605. doi: 10.3390/jcm12072605 (PMC10095552; doi:10.3390/jcm12072605)
Supplement: Supplementary file 1 [file jcm-12-02605-s001.zip]

Archive with 4 entries (4 files):
- SUPPLEMENTARY TABLES  for article 2 02-03-23.pdf
- [Supplementary Figure S1] oncoprint Gene Query of Overexpressed hypoxia genes to cbioportal prostate cancer studies.jpg
- [Supplementary Figure S2] Lysate preparation from FFPE prostate sample slides.JPG
- [Supplementary Figure S3]  Biochemistry of TempO-Seq.JPG
